# Supplementary material
Source: PubMed Central journal article supplement (PMC3277849)
Supplement: NIHMS344136-supplement-1_si_001.pdf [file NIHMS344136-supplement-1_si_001.pdf]

## Supporting Information

### Constant pH Molecular Dynamics Simulations of Nucleic Acids in Explicit Solvent

Garrett B. Goh,<sup>†</sup> Jennifer L. Knight<sup>†</sup> and Charles L. Brooks III<sup>†,‡</sup>

<sup>†</sup> *Department of Chemistry, University of Michigan, 930 N. University, Ann Arbor, Michigan 48109, United States*

<sup>‡</sup> *Biophysics Program, University of Michigan, 930 N. University, Ann Arbor, Michigan 48109, United States*

**Table S1:** Bond Parameters for Protonated Adenine and Cytosine. Parameters were adapted from comparable values from the tautomeric form of cytosine and guanine in CHARMM.<sup>1</sup>

| Atom Types | $K_b$ | $b_o$ |
|------------|-------|-------|
| CN1 NN2C   | 350.0 | 1.335 |
| CN2 NN2C   | 450.0 | 1.343 |
| HN2 NN2C   | 474.0 | 1.01  |

**Table S2:** Angle Parameters for Protonated Adenine and Cytosine. Parameters were adapted from comparable values from the tautomeric form of cytosine and guanine in CHARMM.<sup>1</sup>

| Atom Types    | $K_\theta$ | $\theta_o$ |
|---------------|------------|------------|
| CN4 NN2G CN2  | 70.0       | 131.1      |
| NN2G CN4 NN3A | 70.0       | 122.2      |
| CN5 CN2 NN2G  | 70.0       | 107.8      |
| NN2 CN1 NN2C  | 50.0       | 116.8      |
| NN2C CN1 ON1C | 130.0      | 123.8      |
| CN1 NN2C HN2  | 37.0       | 121.2      |
| CN1 NN2C CN2  | 85.0       | 119.1      |
| CN2 NN2C HN2  | 37.0       | 121.2      |
| CN3 CN2 NN2C  | 85.0       | 119.3      |
| NN2C CN2 NN1  | 81.0       | 122.3      |

**Table S3:** Dihedral Parameters for Protonated Adenine and Cytosine. Parameters were adapted from comparable values from the tautomeric form of cytosine and guanine in CHARMM.<sup>1</sup>

| Atom Types        | $K_{\delta}$ | n | $\delta$ |
|-------------------|--------------|---|----------|
| CN2 NN2G CN4 NN3A | 0.2          | 2 | 180.0    |
| HN2 NN2G CN4 NN3A | 3.6          | 2 | 180.0    |
| CN2 NN2G CN4 HN3  | 4.0          | 2 | 180.0    |
| NN2C CN2 NN1 HN1  | 1.0          | 2 | 180.0    |
| CN1 NN2C CN2 CN3  | 6.0          | 2 | 180.0    |
| NN1 CN2 NN2C CN1  | 2.0          | 2 | 180.0    |
| ON1C CN1 NN2C CN2 | 1.6          | 2 | 180.0    |
| NN2 CN1 NN2C CN2  | 0.6          | 2 | 180.0    |
| ON1C CN1 NN2C HN2 | 3.0          | 2 | 180.0    |
| HN2 NN2C CN1 NN2  | 2.0          | 2 | 180.0    |
| CN3 CN2 NN2C HN2  | 1.0          | 2 | 180.0    |
| HN2 NN2C CN2 NN1  | 2.0          | 2 | 180.0    |
